# Supplementary material
Source: PubMed Central journal article supplement (PMC4497763)

## Supplemental Figure Legends

**Supplemental Figure 1.** Western blot analysis indicated that MIF was detected in the fractions of plasma membrane and cytosol but not in nuclear fraction isolated from *Pkd1* null MEK cells. The isolation (fractionation) of plasma membrane, cytosol and nuclear was described in Methods section. Na/K-ATPase,  $\alpha$ -tubulin and lamin A/C were used as markers for membrane, cytosol and nuclear, respectively.

**Supplemental Figure 2.** Treatment with ISO-1 delayed cyst growth in *Pkd1<sup>flox/flox</sup>:Ksp-Cre* neonates. (A) Histologic examination of PN7 kidneys from *Pkd1<sup>flox/flox</sup>:Ksp-Cre* neonates treated with vehicle (DMSO) ( $n = 10$ ) or ISO-1 ( $n = 6$ ), respectively. Scale bar, 1 mm. (B) Quantification of the percentage of cystic areas over total kidney section areas of PN7 kidney sections from *Pkd1<sup>flox/flox</sup>:Ksp-Cre* neonates treated as in A. Shown is mean  $\pm$  s.e.m. of all sections quantified for each condition.  $p < 0.01$ . (C and D) KW/BW ratios (C) and BUN levels (D) were decreased in *Pkd1<sup>flox/flox</sup>:Ksp-Cre* PN7 neonates treated with ISO-1 compared to that treated with DMSO (control).  $p < 0.001$ . (E) ISO-1 treatment reduced cyst lining epithelial cell proliferation in *Pkd1<sup>flox/flox</sup>:Ksp-Cre* PN7 kidneys as detected by Ki67 staining.  $p < 0.001$ . Scale bar, 100  $\mu$ m. (F) ISO-1 treatment induced cyst lining epithelial cell apoptosis in *Pkd1<sup>flox/flox</sup>:Ksp-Cre* PN7 kidneys as detected by TUNEL assay.  $p < 0.001$ . Scale bar, 100  $\mu$ m.

**Supplemental Figure 3.** Statistical analysis of the body weight of *Pkd1<sup>flox/flox</sup>:Ksp-Cre* mice at postnatal day 7, *Pkd1<sup>flox/flox</sup>:Pkd1-Cre* mice at postnatal day 25 and *Pkd1<sup>nl/nl</sup>* mice at postnatal day 28 treated with DMSO and ISO-1 respectively.

**Supplemental Figure 4.** Western blot analysis of MIF in two kidneys from *Pkd1<sup>flox/flox</sup>:Ksp-Cre:MIF<sup>-/-</sup>*, *Pkd1<sup>+/+</sup>:Ksp-Cre:MIF<sup>+/+</sup>* and *Pkd1<sup>flox/flox</sup>:Ksp-Cre:MIF<sup>+/-</sup>* neonates, respectively.

**Supplemental Figure 5.** Knockout of MIF or inhibition of MIF with ISO-1 leads to diminished levels of macrophages in pericystic and interstitial regions of *Pkd1* conditional knockout mouse kidneys. **(A)** The accumulation/recruitment of macrophages to pericystic sites and interstitium in kidneys from *Pkd1<sup>flox/flox</sup>:Ksp-Cre:MIF<sup>-/-</sup>* mice was dramatically reduced at postnatal day 7 compared to that from age matched kidneys of *Pkd1<sup>flox/flox</sup>:Ksp-Cre:MIF<sup>+/+</sup>* mice.  $p < 0.001$ . Scale bar, 100  $\mu$ m. **(B-D)** Treatment with ISO-1 dramatically reduced the accumulation/recruitment of macrophages to pericystic sites and interstitium in kidneys from *Pkd1<sup>flox/flox</sup>:Ksp-Cre* mice at postnatal day 7 **(B)**, *Pkd1<sup>flox/flox</sup>:Pkhd1-Cre* mice at postnatal day 25 **(C)** and *Pkd1<sup>nl/nl</sup>* mice at postnatal day 28 **(D)** compared to that from age matched kidneys of *Pkd1<sup>flox/flox</sup>:Ksp-Cre* mice, *Pkd1<sup>flox/flox</sup>:Pkhd1-Cre* mice and *Pkd1<sup>nl/nl</sup>* mice treated with DMSO, respectively.  $p < 0.001$ . Scale bar, 100  $\mu$ m.

**Supplemental Figure 6.** Treatment with ISO-1 decreased the expression of MIF in *Pkd1* mutant kidneys from *Pkd1<sup>flox/flox</sup>:Ksp-Cre* mice and *Pkd1<sup>flox/flox</sup>:Pkhd1-Cre* mice compared to that from age matched control mice treated with DMSO. **(A and B)** Western blot analysis of the expression of MIF in kidneys from three different *Pkd1<sup>flox/flox</sup>:Ksp-Cre* mice **(A)** and *Pkd1<sup>flox/flox</sup>:Pkhd1-Cre* mice **(B)** treated with DMSO or ISO-1, respectively. **(C and D)** Immunohistochemistry staining of MIF in kidneys from *Pkd1<sup>flox/flox</sup>:Ksp-Cre* mice **(C)** and *Pkd1<sup>flox/flox</sup>:Pkhd1-Cre* mice **(D)** treated with DMSO or ISO-1, respectively. Scale bar, 100  $\mu$ m.

**Supplemental Figure 7.** MIF can be secreted in cell culture media of renal epithelial cells and is highly enriched in cyst fluids and urines derived from two distinct orthologous mouse models of ADPKD. **(A)** Western blot analysis of the levels of MIF in cell culture media of *Pkd1* wild type (WT) and mutant (Null) MEK cells standardized to the same cell numbers of different cell types.  $p < 0.001$ . **(B)** Western blot analysis of the levels of MIF in cyst fluids from four different *Pkd1<sup>flox/flox</sup>:Ksp-Cre* mice and

*Pkd1<sup>flox/flox</sup>.Pkh1-Cre* mice, respectively. (C) Western blot analysis of the levels of MIF in urines from *Pkd1<sup>flox/flox</sup>.Ksp-Cre* mice at PN7 and PN14 as well as from *Pkd1<sup>flox/flox</sup>.Pkh1-Cre* mice at PN14 and PN25, respectively.

**Supplemental Figure 8.** (A) Western blot analysis of the levels of MIF in cyst fluids from five male and five female ADPKD patients, respectively. Our results indicated that MIF might form a dimer in human cyst fluids. (B) Western blot analysis of the levels of MIF in urines from four male ADPKD patients and four normal males (*top panel*) as well as from four female patients and four normal females (*bottom panel*), respectively.

**Supplemental Figure 9.** MIF promotes macrophage migration. Addition of ISO-1 (100  $\mu$ m) blocked ADPKD CM-induced migration of human THP-1 monocytes.  $p < 0.0001$ ; ANOVA post hoc test.

**Supplemental Figure 10.** (A) MCP-1 expression was increased in *Pkd1* mutant mouse embryonic kidney (MEK) cells and postnatal *Pkd1* homozygous PN24 cells compared to *Pkd1* wild-type MEK cells and postnatal *Pkd1* heterozygous PH2 cells as analyzed with western blot. (B-D) MCP-1 was elevated in kidneys from *Pkd1<sup>flox/flox</sup>.Ksp-Cre* mice (B) and *Pkd1<sup>flox/flox</sup>.Pkh1-Cre* mice (C) as well as in kidneys from ADPKD patients (D) compared to that in age matched wild type mouse kidneys and normal human kidneys as analyzed with immunohistochemistry staining, respectively. Treatment with ISO-1 decreased the expression of MCP-1 in *Pkd1* mutant kidneys from *Pkd1<sup>flox/flox</sup>.Ksp-Cre* mice (B) and *Pkd1<sup>flox/flox</sup>.Pkh1-Cre* mice (C) compared to that in age matched control kidneys treated with DMSO, respectively.

**Supplemental Figure 11.** Treatment with ISO-1 decreased the levels of MCP-1 mRNA (A) and protein (B) in kidneys from *Pkd1<sup>flox/flox</sup>.Pkh1-Cre* mice compared with DMSO treated control mice as examined by qRT-PCR and western blot, respectively.  $n = 3$ ,  $p < 0.05$ ; ANOVA post hoc test.

**Supplemental Figure 12.** MIF promotes the expression of MCP-1 and TNF- $\alpha$  whereas TNF- $\alpha$  also induces the expression of MIF in renal epithelial cells. **(A and B)** Western blot analysis of the expression of MCP-1 and TNF- $\alpha$  from whole cell lysates of *Pkd1* mutant PN24 cells **(A)** and *Pkd1* mutant MEK cells **(B)** induced with MIF (10 ng/ml) at indicated time points. **C.** Western blot analysis of the expression of MIF from whole cell lysates of *Pkd1* wild type and null MEK cells induced with TNF- $\alpha$  (50 ng/ml) at indicated time points.

**Supplemental Figure 13. (A and B)** qRT-PCR analysis of the expression of *Hk1* **(A)** and *Ldha* **(B)** mRNA in *Pkd1* wild type (WT) and mutant (Null) MEK cells untreated or treated with ISO-1 or MIF siRNA. The transcription of the key glycolytic enzymes, *Hk1* and *Ldha* ( $p < 0.001$ ; ANOVA post hoc test.) was significantly increased in *Pkd1* mutant (Null) MEK cells compared to *Pkd1* wild type MEK cells. Treatment with ISO-1 or MIF siRNA did not affect the transcription of the key glycolytic enzymes, *Hk1* and *Ldha*, in *Pkd1* wild type MEK cells. However, treatment with ISO-1 or MIF siRNA significantly decreased the transcription of *Hk1* and *Ldha* ( $p < 0.001$ ; ANOVA post hoc test.) in *Pkd1* mutant (Null) MEK cells compared to untreated *Pkd1* mutant (Null) MEK cells, respectively.

**Supplemental Figure 14. (A)** Western blot analysis of the expression of ERK and phospho-ERK from whole cell lysates of *Pkd1* mutant PN24 cells treated with MIF (10 ng/ml) or ISO-1 (100  $\mu$ M) at indicated time points. **(B)** Western blot analysis of the levels of phospho-ERK in *Pkd1* null cells and PN24 cells treated with conditional media collected from *Pkd1* null MEK cells transfected with control siRNA or MIF siRNA for 72 hours. The phosphorylation of ERK could be induced in *Pkd1* null cells and PN24 cells treated with conditional media collected from cystic renal epithelial cells transfected with control siRNA at indicated time points but could not be induced in these cells treated with conditional media collected from MIF knockdown cystic renal epithelial cells.

**Supplemental Figure 15.** Western blot analysis of the expression of MIF from whole cell lysates of *Pkd1* mutant (Null) MEK cells treated with Hsp90 inhibitors, STA9090 (100 nM) or 17-AAG (1  $\mu$ M), at indicated time points.

**Supplemental Figure 16. (A-B)** Analysis of the expression of CD74 protein (**A**) and mRNA (**B**) of *Pkd1* wild-type (WT) and *Pkd1*<sup>null/null</sup> (Null) MEK cells as well as postnatal *Pkd1* heterozygous PH2 (PH2) cells and *Pkd1* homozygous PN24 (PN24) cells by Western blot and qRT-PCR, respectively. (**C**) CD74 was elevated in kidney sections from normal and ADPKD kidneys as examined by immunohistochemistry staining with anti-CD74 antibody. Scale bar, 100  $\mu$ m. (**D**) Western blot analysis of the expression of phospho-ERK, total ERK and MCP-1 in PN24 cells that were pretreated with normal IgG or CD74 antibody for 2 hours and then were stimulated with recombinant MIF (10 ng/ml) at indicated time points. Treatment with CD74 antibody blocked MIF induced the phosphorylation of ERK but did not affect MIF induced MCP-1 expression.

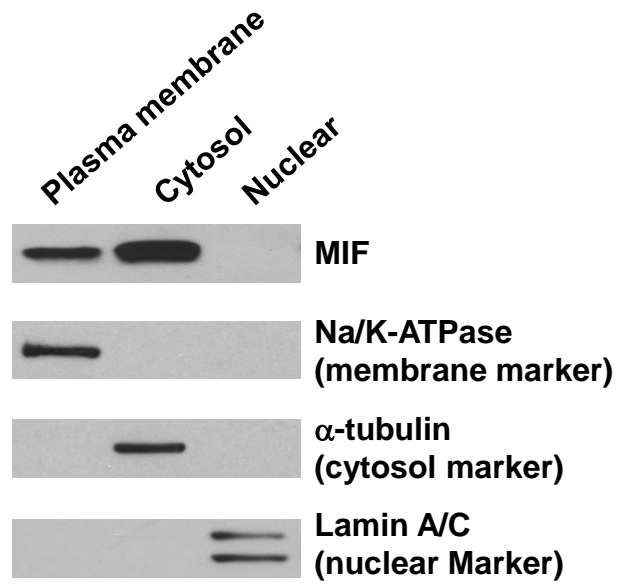

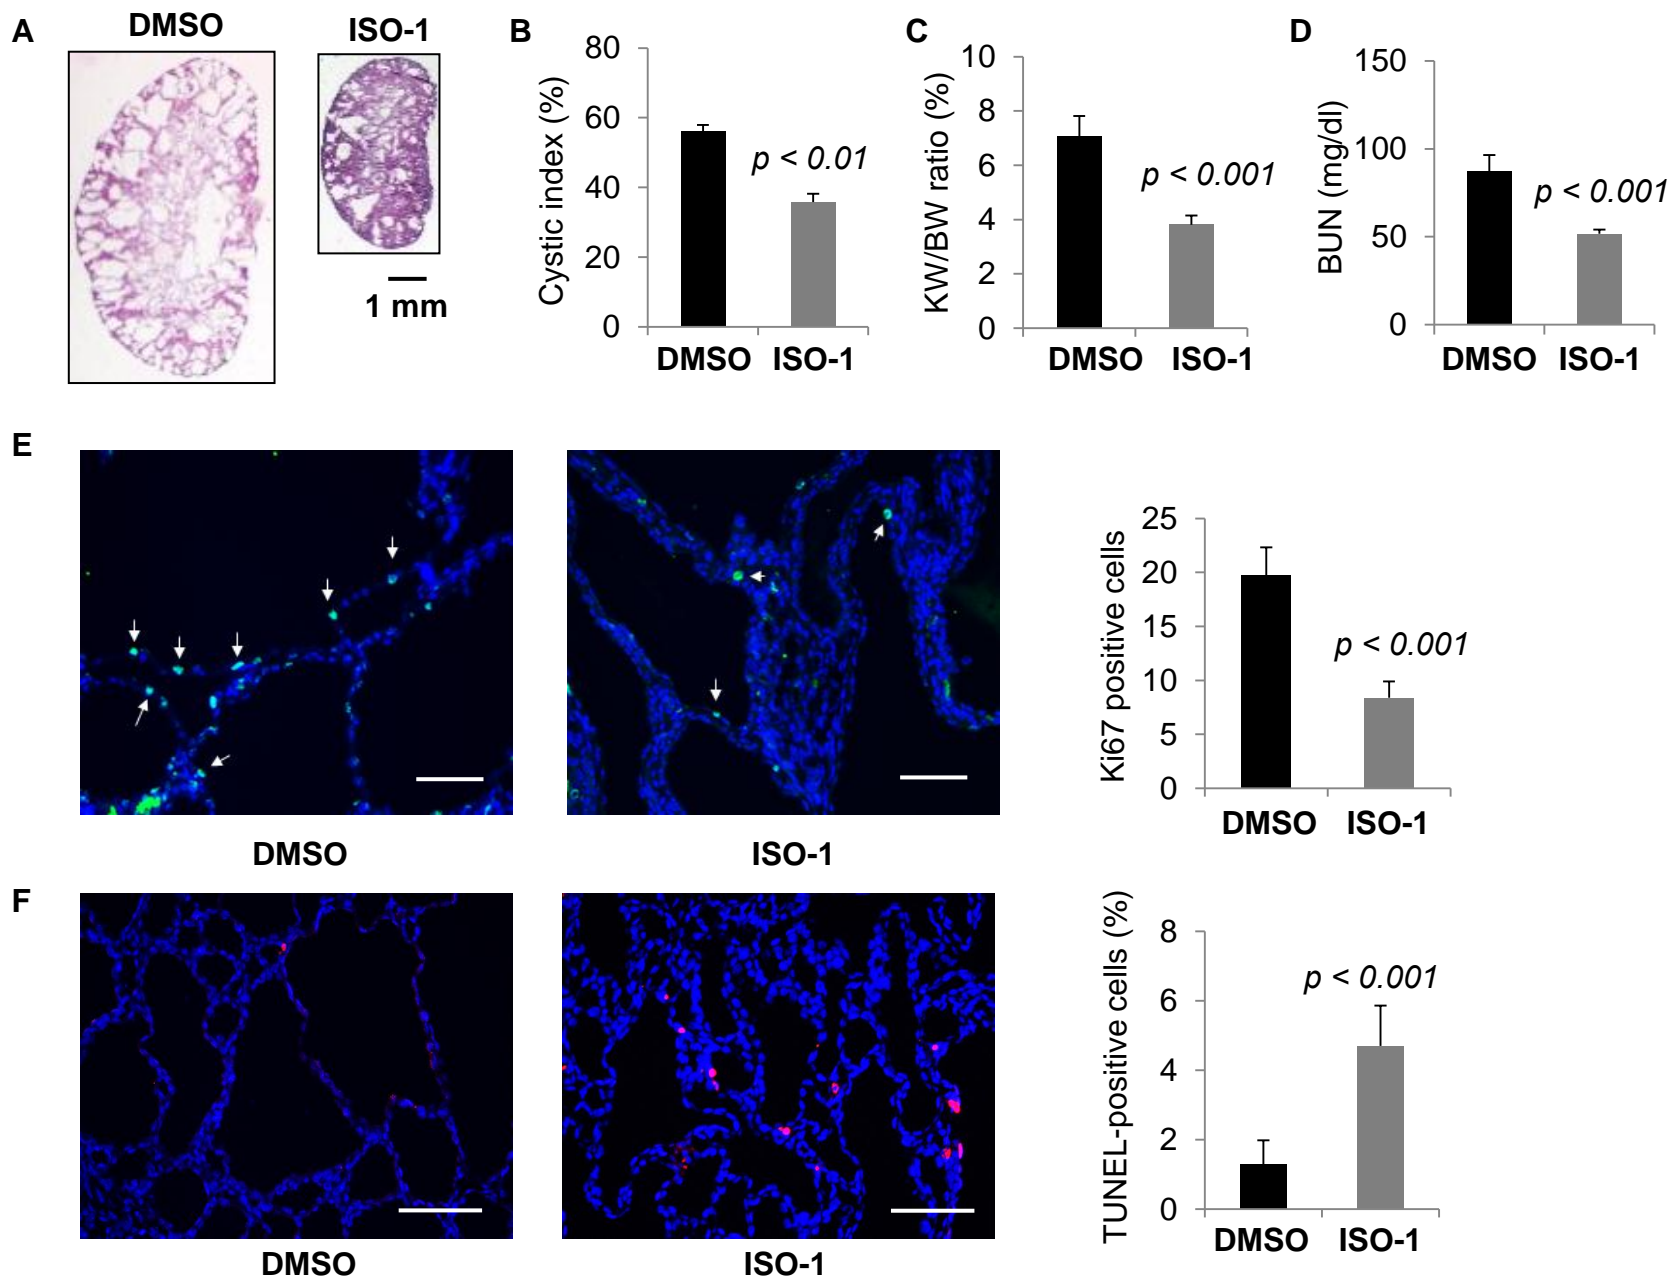

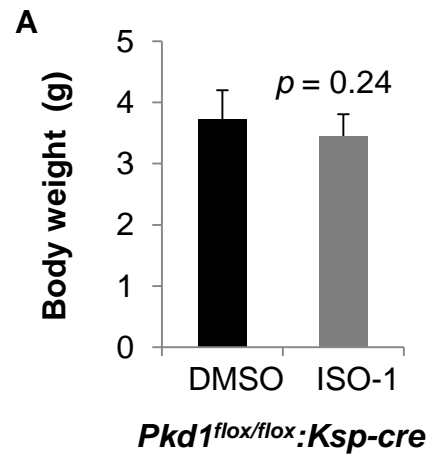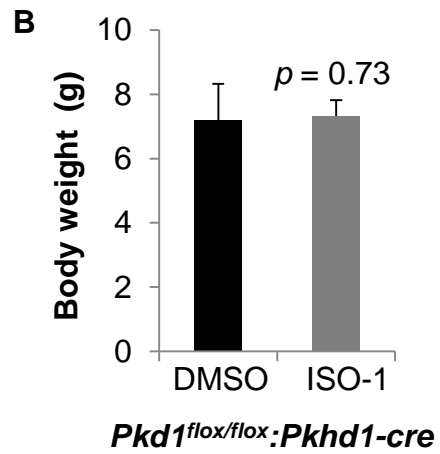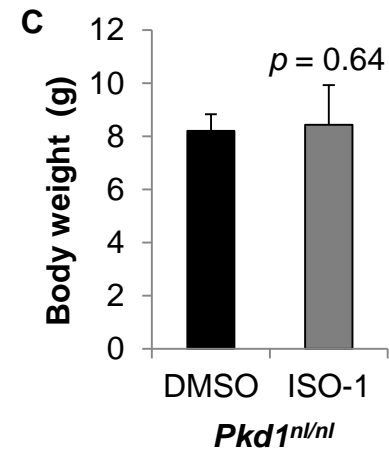

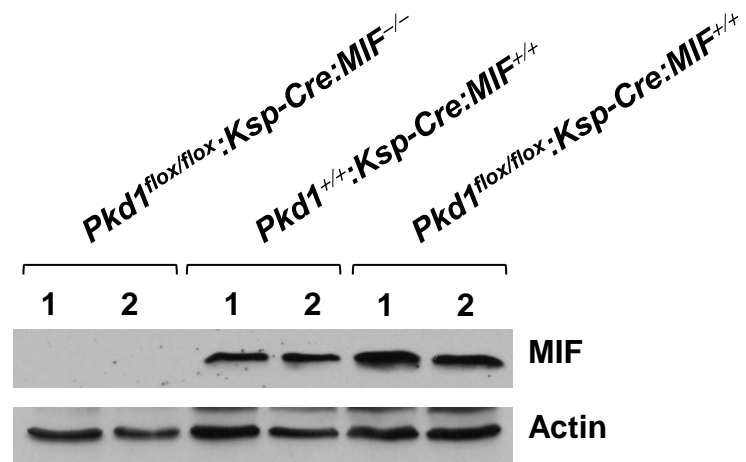

A

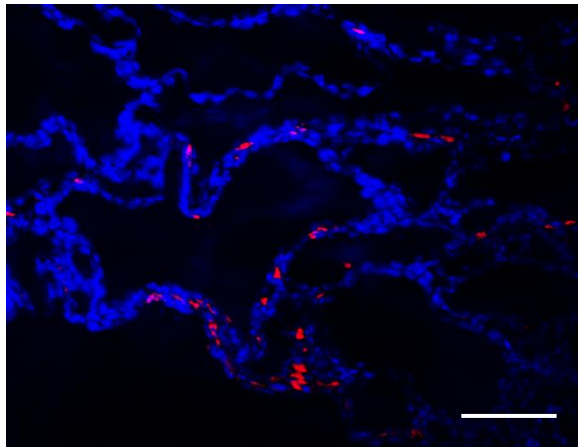*Pkd1<sup>flox/flox</sup>:Ksp-Cre:MIF<sup>+/+</sup>*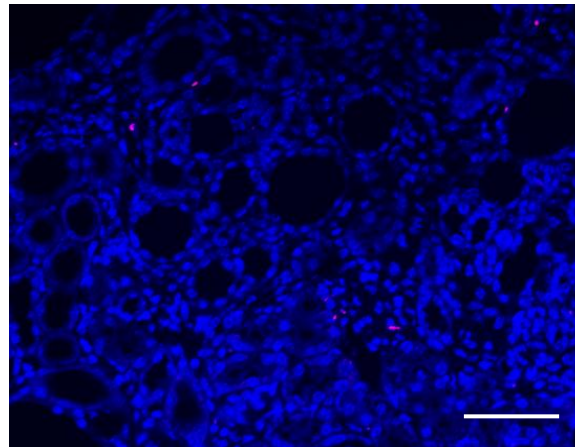*Pkd1<sup>flox/flox</sup>:Ksp-Cre:MIF<sup>-/-</sup>*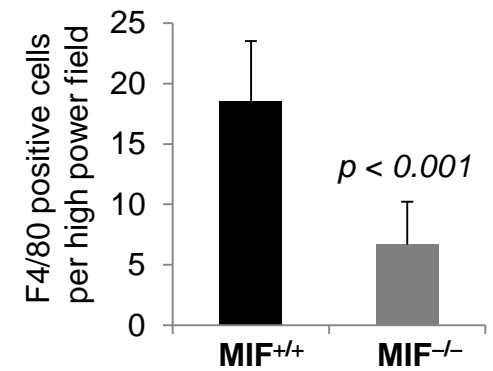

B

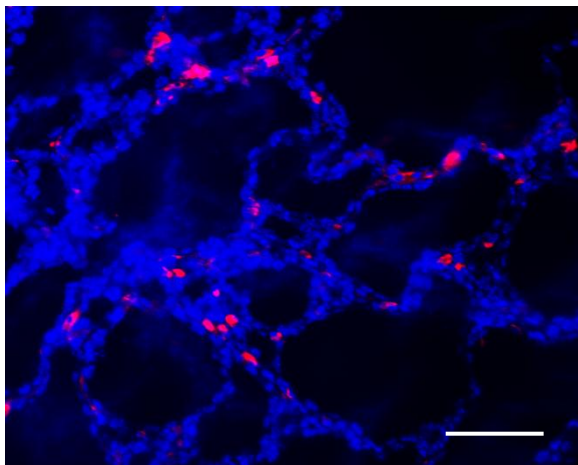*Pkd1<sup>flox/flox</sup>:Ksp-cre + DMSO*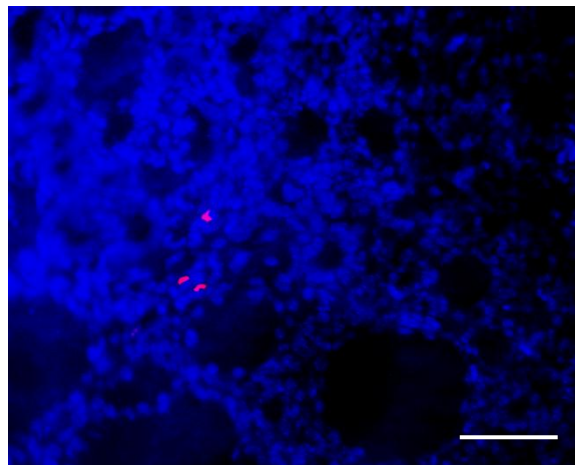*Pkd1<sup>flox/flox</sup>:Ksp-cre + ISO-1*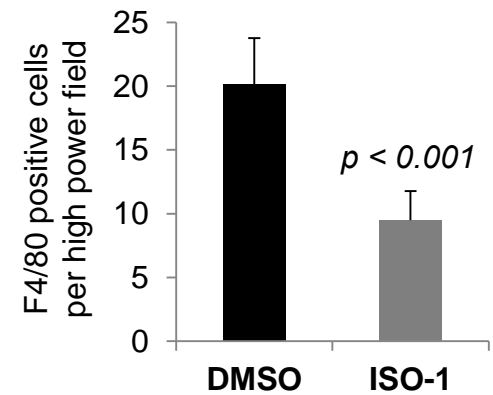

C

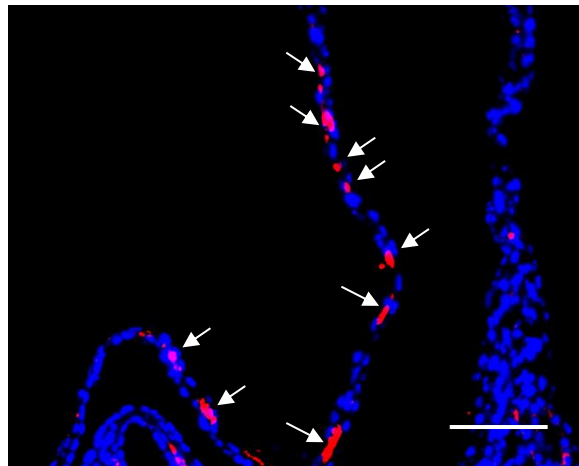*Pkd1<sup>flox/flox</sup>;Pkhd1-cre* + DMSO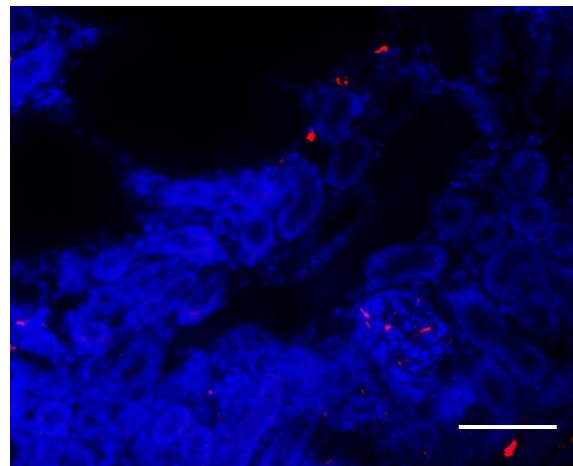*Pkd1<sup>flox/flox</sup>;Pkhd1-cre* + ISO-1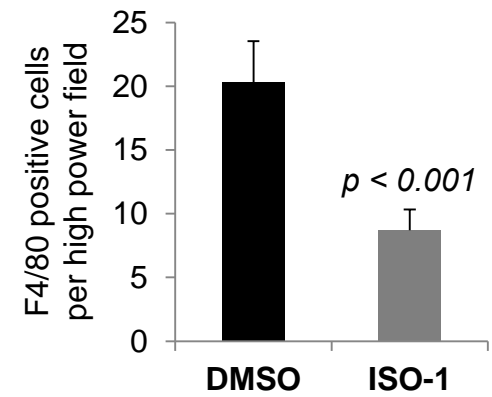

D

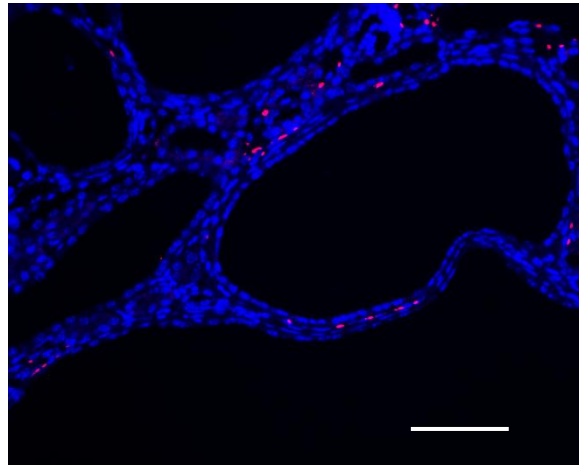*Pkd1<sup>nl/nl</sup>* + DMSO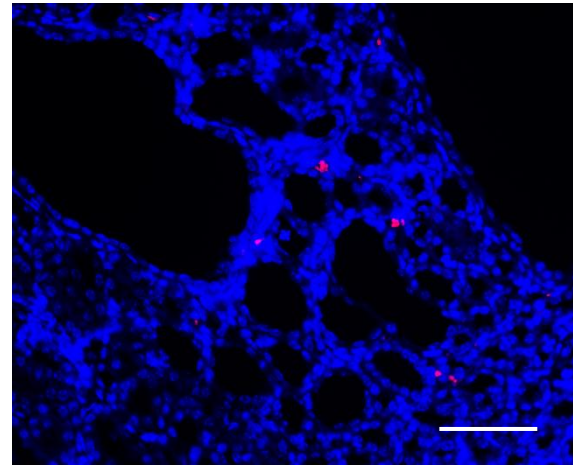*Pkd1<sup>nl/nl</sup>* + ISO-1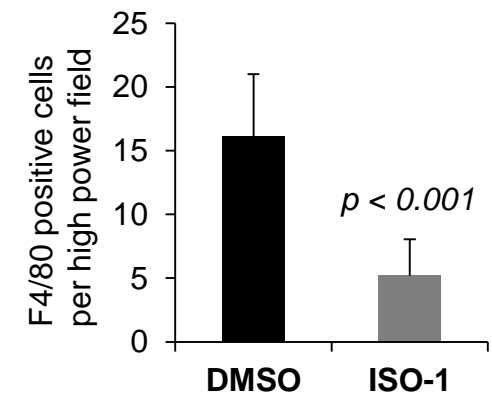

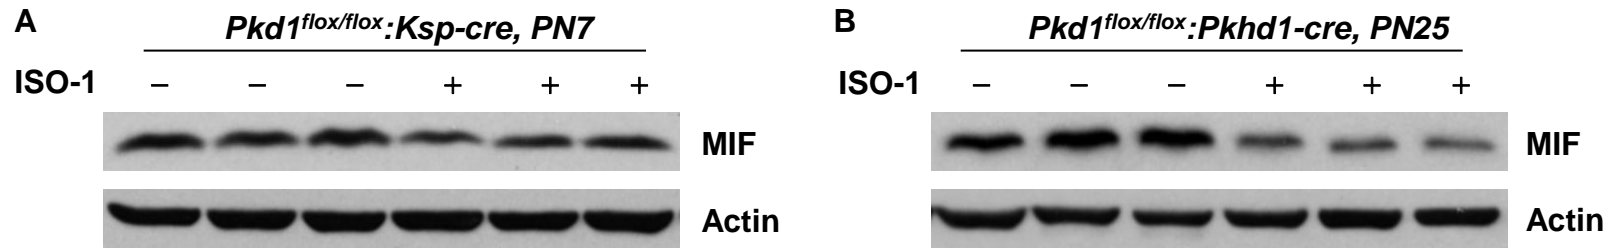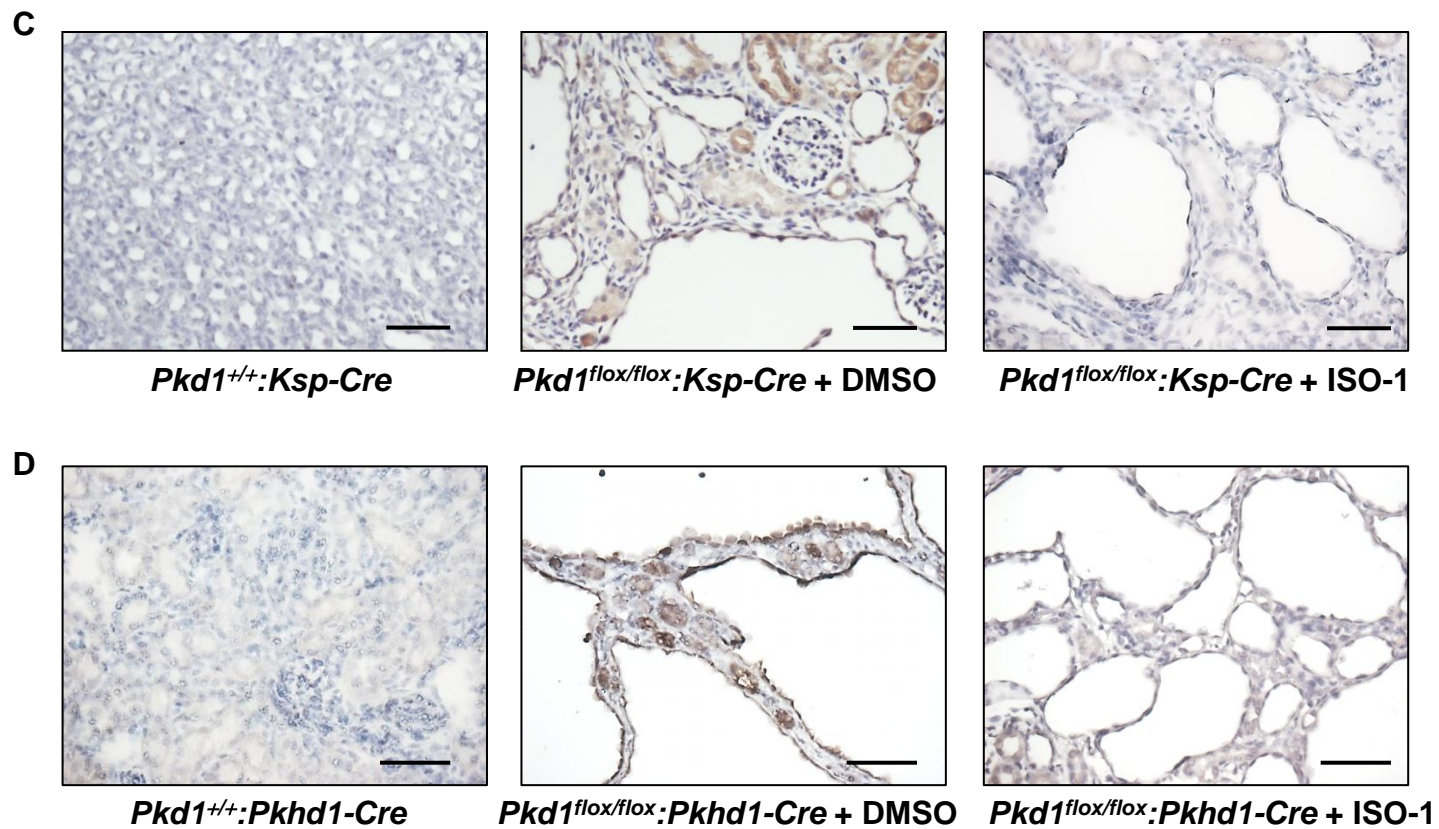

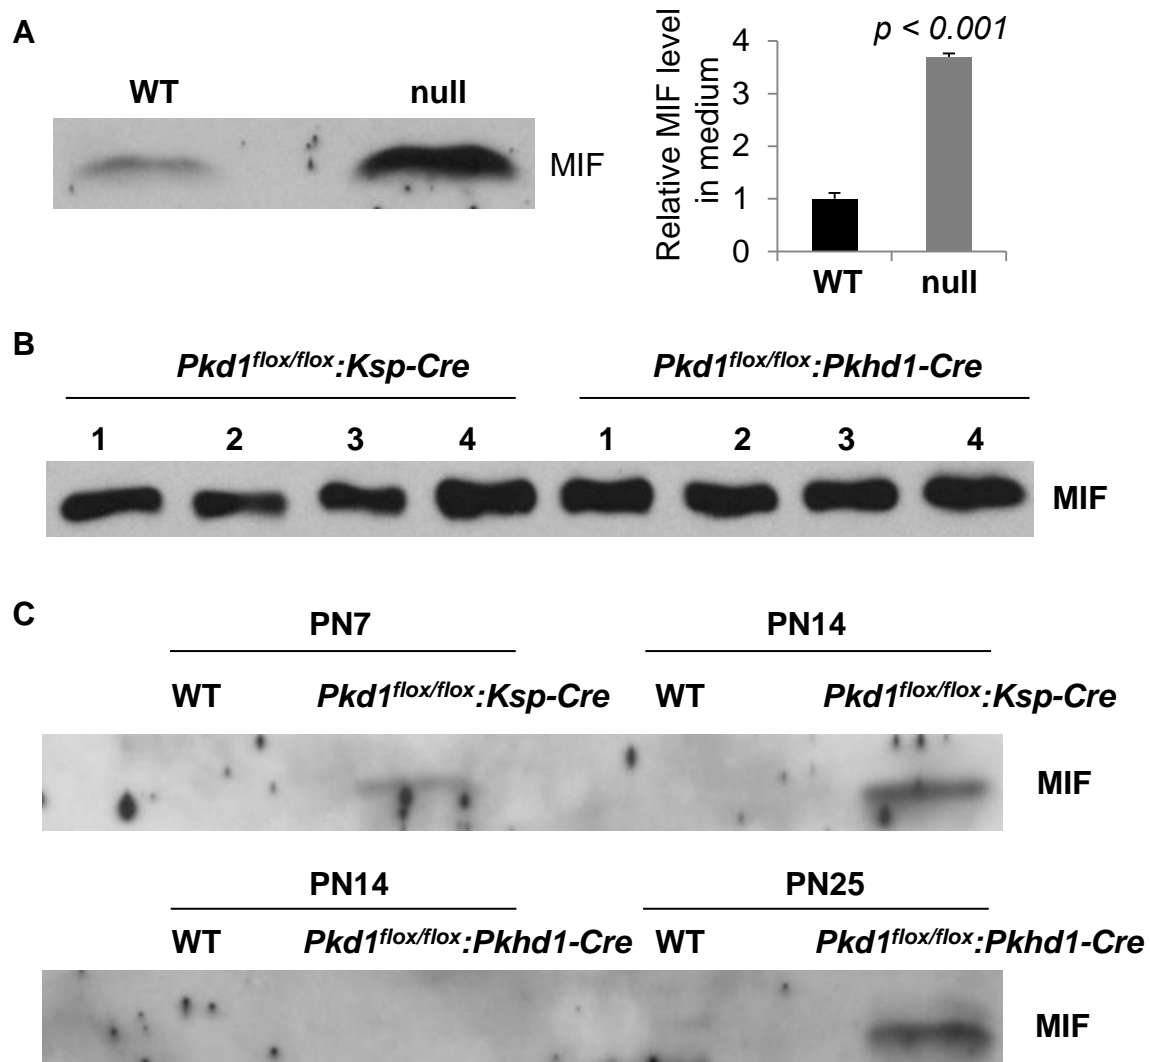

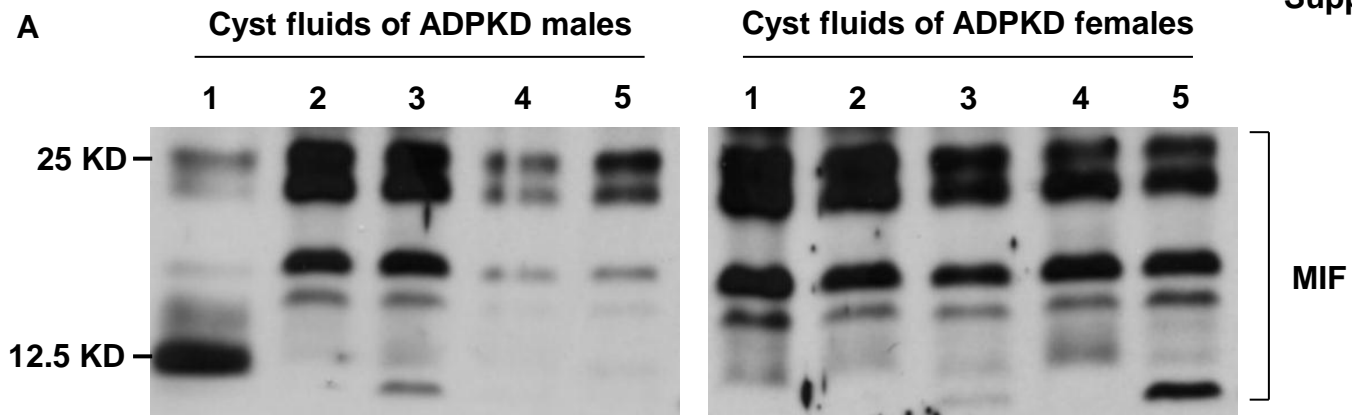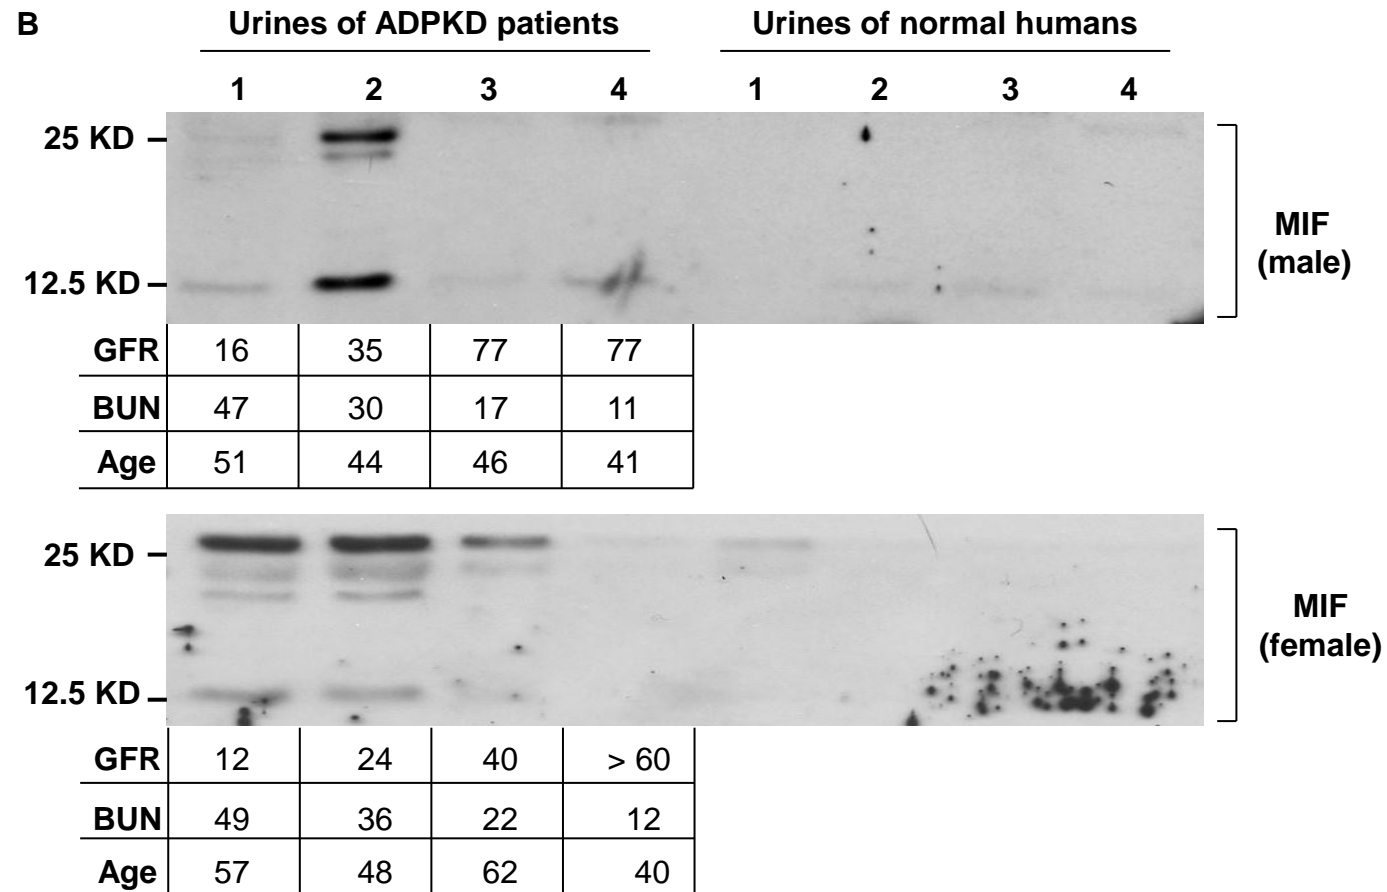

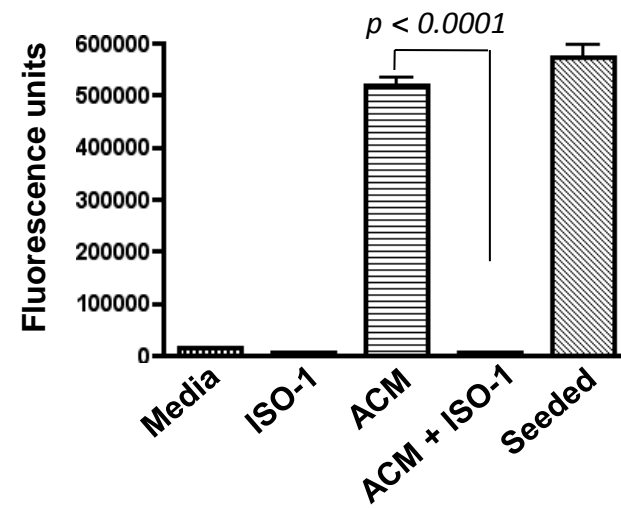

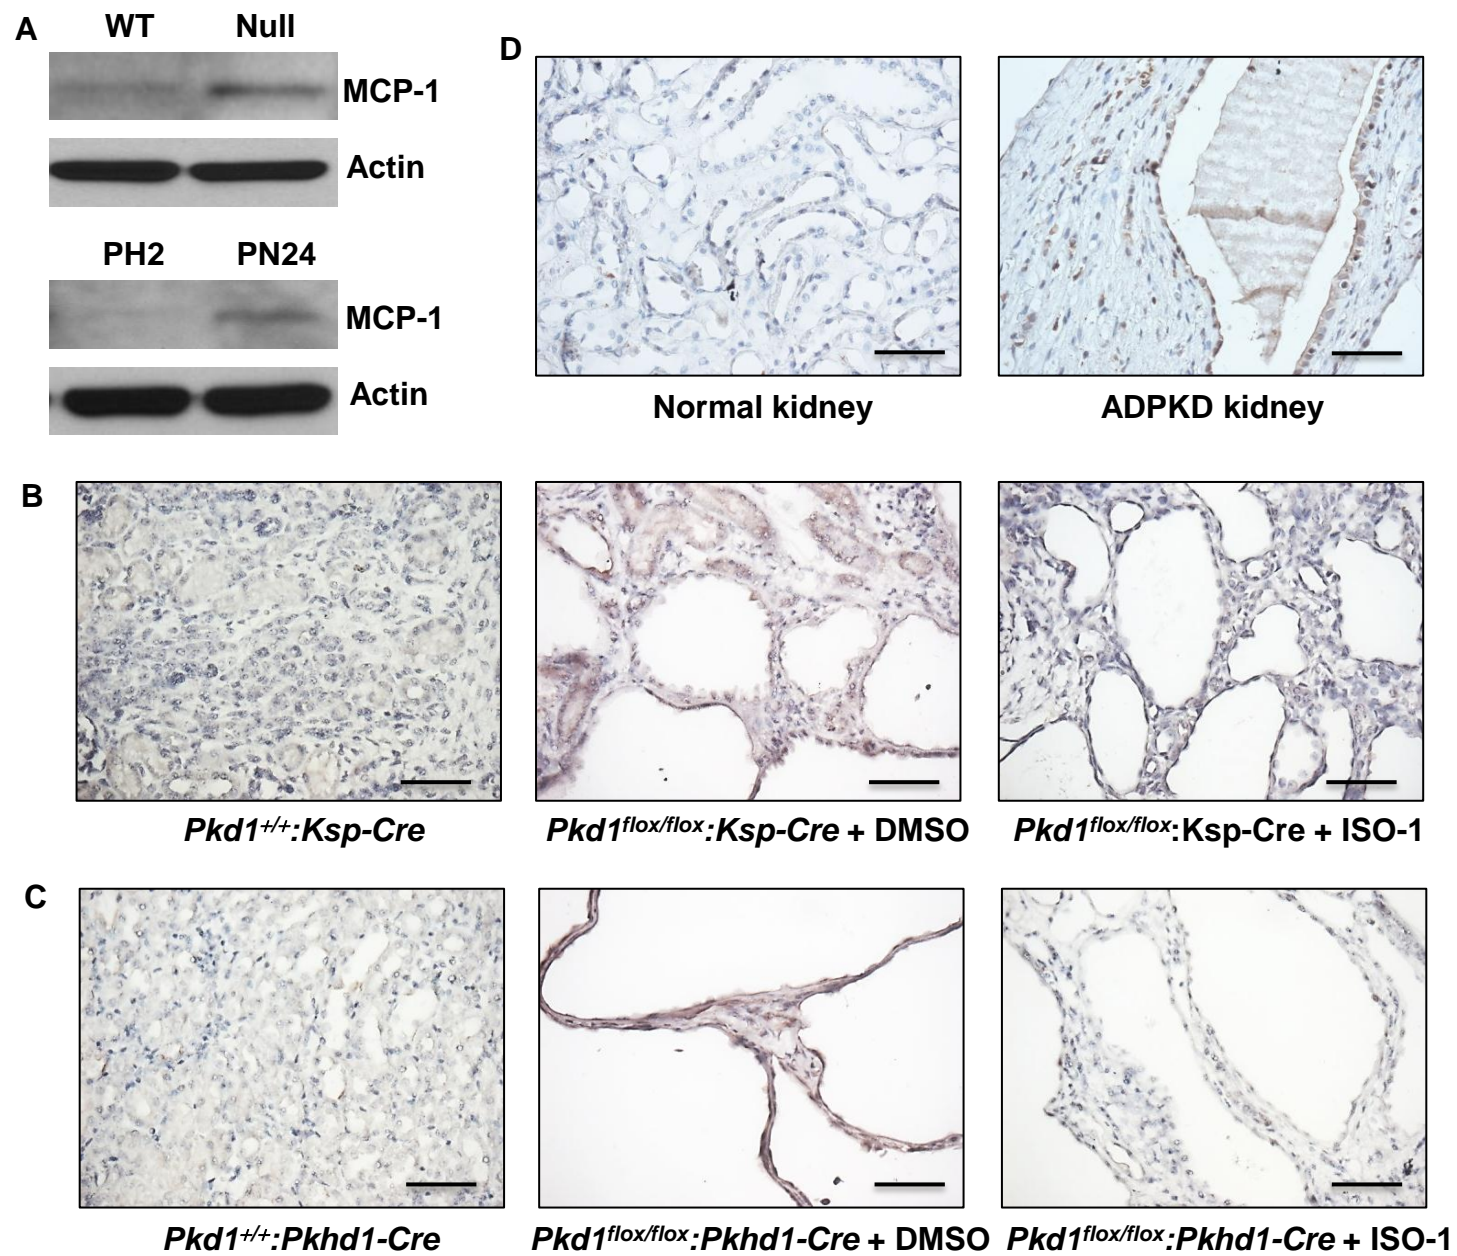

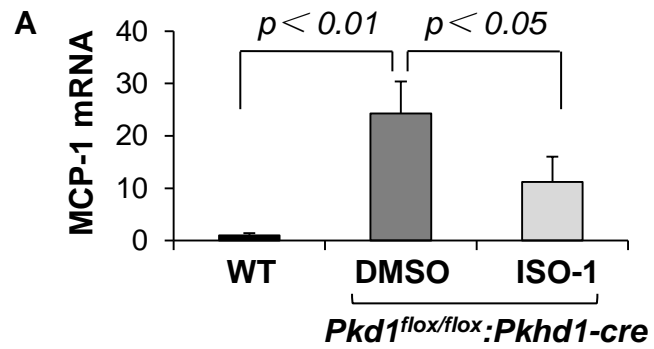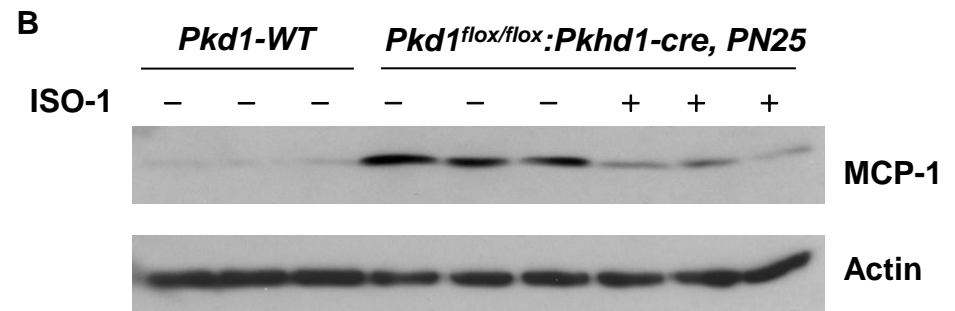

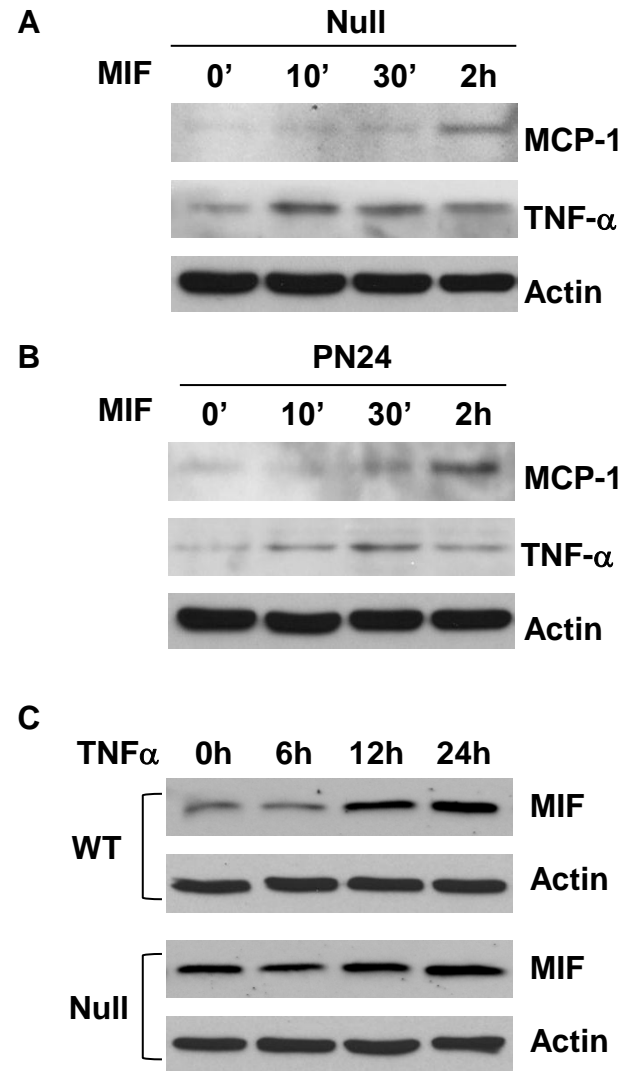

**A**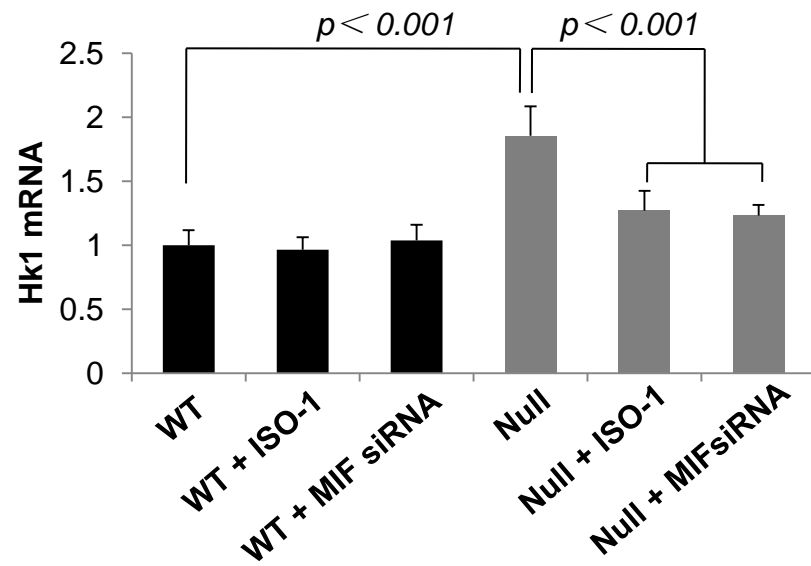**B**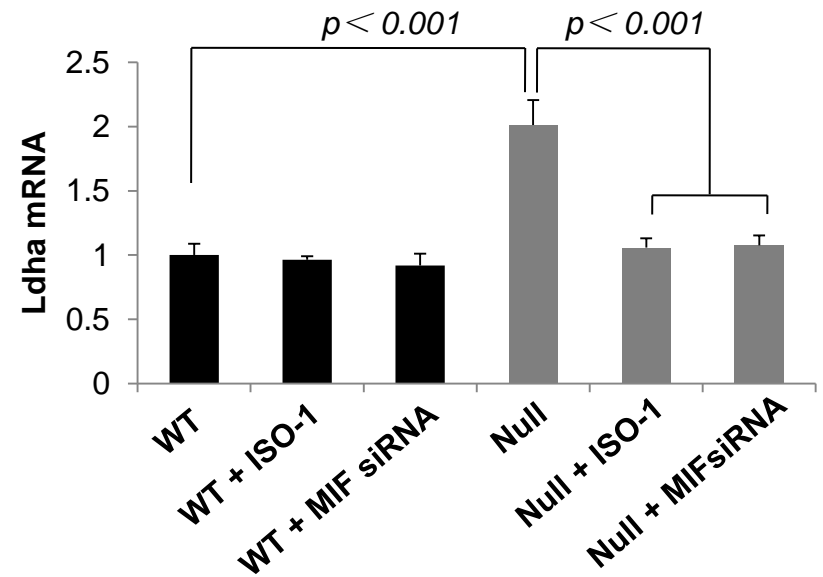

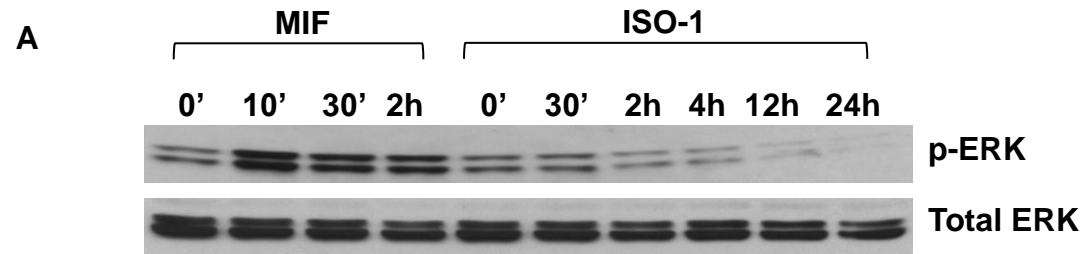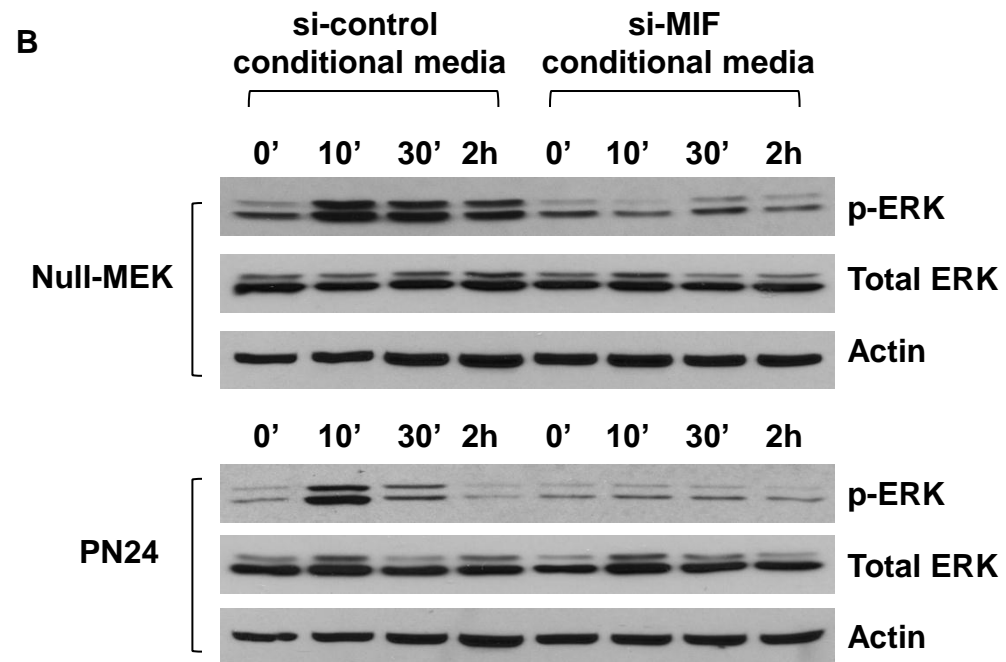

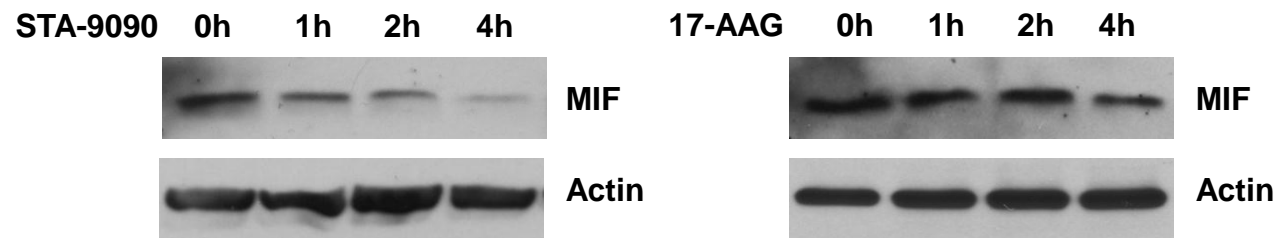

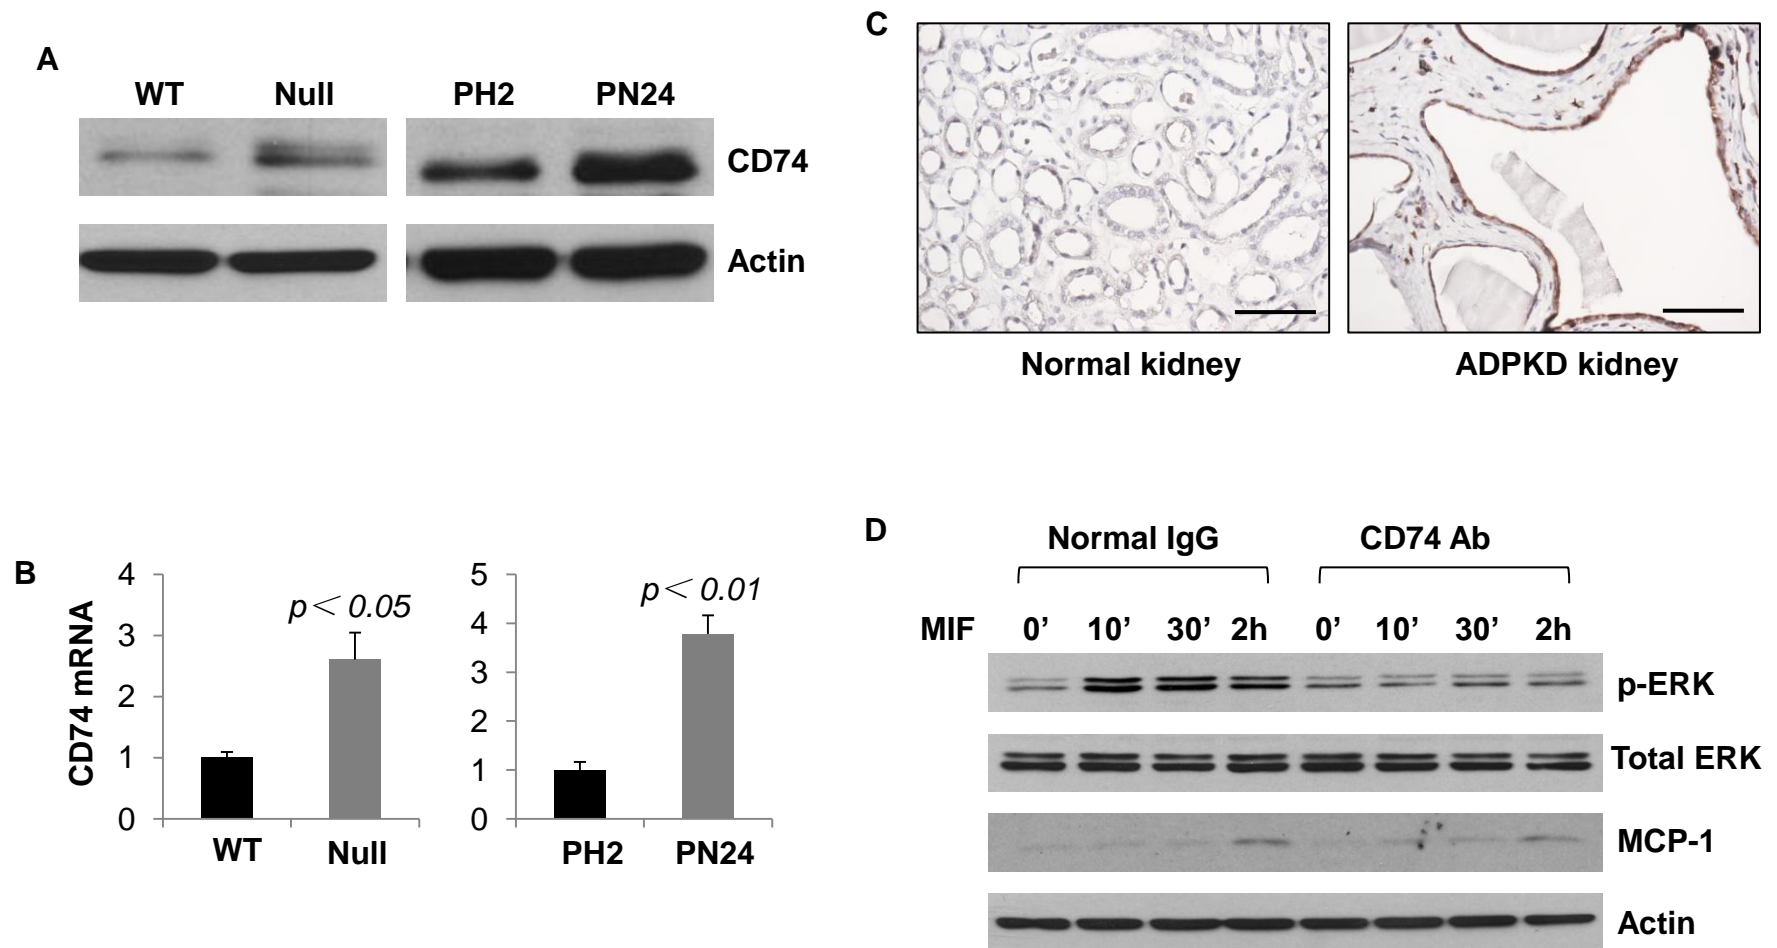

Supplement: JCI80467sd.pdf [file JCI80467sd.pdf]
